# Supplementary material for: Medical Interns’ Perceptions about Disclosing Medical Errors
Source: Hindawi journal article supplement (doi:10.1155/2021/1102135), 2021-08-25
Supplement: f1 [file 1102135.f1.docx]

**Introduction**

The present questionnaire is aimed to evaluate medical interns’ attitudes toward disclosing medical error. Medical error is defined as “the failure of scheduled actions to achieve the expected goals, a mistake in planning, or deviating from the care process, which can cause harm to the patient,” and could be classified into two main categories: minor/or near miss error and major error. Minor error is an error that leads to an injury that is neither long-lasting nor life-threatening and major error is an error that results in a lasting injury or fatal harm.

MEs and the related adverse could cause several medical disabilities and are the main reasons of accumulating complaints in hospitals. The errors might prolong the inpatient services and result in death in some cases. MEs could occur because of burnout of the healthcare workers, lack of medical knowledge and job experience, absence of communication between the workers and inadequate supervision. Nevertheless, finding consistent causes of the errors and providing practical solutions are challenging tasks; as the errors may happen because of several personal, interpersonal and systemic factors.

The first part of the inquiry gathers demographic information. The second and third parts include questions about the participants’ experiences regarding ME and ME disclosure. The fourth part is based on Likert-scale grades (Totally agree= 5, totally disagree= 1), and includes 32 questions that evaluate the interns’ agreement and commitment on disclosing MEs.

**Demographics**

1. Gender: Male/ Female
2. Stage of internship program: 1st sixth month/ 2nd sixth month/ 3rd sixth month
3. Marital status: Single/ Married/ Others
4. Religious belief: Strict Muslim/ Moderate Muslim/ Unconvinced Muslim/ Others
5. Have you completed medical ethics courses with the subject of medical error disclosure? Yes/ Somehow/ No
6. Were the medical ethics courses with the subject of medical error disclosure enough and sufficient? Yes/ Somehow/ No

**Exposure to Medical Error**

1. Have you ever encountered with a major medical error? Yes / No
2. Have you ever encountered with a minor medical error? Yes / No

**Disclosure of and Response to Medical Error**

1. Would you report a major medical error, in the case it happened? Definitely/ Possibly/ Certainly Not

Please note the reason if possible: ……………………………………………..

1. Would you report a minor medical error, in the case it happened? Definitely/ Possibly/ Certainly Not

Please note the reason if possible: ……………………………………………..

1. Did you disclose the medical error the last time you encountered with one? Yes/ No
2. Did you disclose the major medical error the last time you encountered with one? Yes/ No
3. Did you disclose the major medical error the last time you encountered with one? Yes/ No
4. Did you properly managed the medical error and its adverse effects the last time you encountered with one? Yes/ No
5. Did you try to find the cause of the medical error the last time you encountered with one? Yes/ No
6. Describe one time you encountered with a medical error, if possible:

Type of error: Minor/ Major

How did the error happen? ……………………………………………..

Did you explain the error to the patient? Why? ……………………………………………..

What was the consequence of error for the patient? ……………………………………………..

What was the consequence of error for the you? ……………………………………………..

How did you compensate the error? ……………………………………………..

How was the cause of error found? ……………………………………………..

**Attitudes toward Medical Error**

Please rate each item as to the extent/desire you tend to display the following behaviors and traits using the below scale:

1- Completely agree, 2- Agree, 3- Somehow Agree, 4- Disagree, 5- Completely disagree

| Question | 1 | 2 | 3 | 4 | 5 |
| --- | --- | --- | --- | --- | --- |
| 1. Patients have the right to be informed about medical errors. |  |  |  |  |  |
| 2. Medical error disclosure helps the physicians to keep their professional integrity. |  |  |  |  |  |
| 3. Medical error disclosure could reverse the adverse effect of the error. |  |  |  |  |  |
| 4. Medical error disclosure is a sign of physicians’ conscious and morality. |  |  |  |  |  |
| 5. Medical error could affect both physicians and patients. |  |  |  |  |  |
| 6. There is no need of disclosing the error as they are inevitable. |  |  |  |  |  |
| 7. The health-care system should be blamed for any medical error, not the physician. |  |  |  |  |  |
| 8. Physician should only apologize the patients after occurrence of medical error, and no further action is needed. |  |  |  |  |  |
| 9. Medical error disclosure could lead to litigation of physicians. |  |  |  |  |  |
| 10. The physicians’ might lose their respect and esteem because of medical error disclosure. |  |  |  |  |  |
| 11. The patients and their families might dangerously overreact to the problem. |  |  |  |  |  |
| 12. The physicians might encounter with penalties if they report their errors. |  |  |  |  |  |
| 13. The patients cannot properly understand the medical error. |  |  |  |  |  |
| 14. Lack of communication skills could be a cause of not reporting medical errors. |  |  |  |  |  |
| 15. Lack of knowledge could be a cause of not reporting medical errors. |  |  |  |  |  |
| 16. There is no need for medical error disclosure, however, it must be compensated. |  |  |  |  |  |
| 17. Minor medical error should be disclosed to the patients and their relatives. |  |  |  |  |  |
| 18. Major medical error should be disclosed to the patients and their relatives. |  |  |  |  |  |
| 19. Minor medical error should be disclosed to the residents. |  |  |  |  |  |
| 20. Major medical error should be disclosed to the residents. |  |  |  |  |  |
| 21. Minor medical error should be disclosed to the attendings. |  |  |  |  |  |
| 22. Major medical error should be disclosed to the attendings. |  |  |  |  |  |
| 23. Minor medical error should be disclosed to the senior nurses. |  |  |  |  |  |
| 24. Major medical error should be disclosed to the senior nurses. |  |  |  |  |  |
| 23. Minor medical error should be disclosed to the ward supervisor. |  |  |  |  |  |
| 24. Major medical error should be disclosed to the ward supervisor. |  |  |  |  |  |
| 25. There is no need to disclose minor medical error. |  |  |  |  |  |
| 25. There is no need to disclose major medical error. |  |  |  |  |  |
| 26. There is no need to disclose medical error to authorities, because physicians are not expected to do so. |  |  |  |  |  |
| 27. There is no need to disclose medical error, because even when medical errors are disclosed, the management will not compensate the error appropriately. |  |  |  |  |  |
| 28. There is no need to disclose medical error, because the adverse effects of error are commonly minimal. |  |  |  |  |  |
| 29. Disclosing medical error to the patients may lead to increased levels of anxiety and stress among them. |  |  |  |  |  |
| 30. Disclosing medical error to the patients may help them feel to have more control over the adverse effects of error. |  |  |  |  |  |
| 31. Every physician is required to compensate the medical error. |  |  |  |  |  |
| 32. The compensation of medical errors is among hospital managements’ responsibilities rather than to be that of physicians. |  |  |  |  |  |

**Scenarios**

Please imagine yourself in the following scenarios and answer the questions.

1. A male patient who is 68-year-old has been admitted to the Coronary Care Unit due to atrial fibrillation. The cardiologists stabilized the patient and controlled heart rate by emergent interventions. Hence, heparin and warfarin were prescribed for the patient. The patient's hemodynamic status was secured, and the International Normalized Ratio (INR) reached to the accepted level (2-2.5). The attending physician discharged the patient of the service, and the resident physician asked you to write and order a prescription and recommendation for the patient as one tablet of warfarin once daily, check prothrombin time (PT) and INR every three days, and an outpatient visit in 2 weeks. A week later, the patient returned to the emergency department with a large and painful hematoma in the thigh area and an INR of 14.7.
2. How would you respond to the situation? ……………………………………………..
3. What is the type of error? Major/ Minor
4. Would you report the error? Yes/ No
5. Who would you report the error to? Patients/ Residents/ Attendings/ Others
6. In the pediatric ward, a 4-year-old girl with chronic granulomatosis is hospitalized with diagnosis of the left knee septic arthritis. The attending physician had ordered a Magnetic Resonance Imaging (MRI) of the left knee. In the request form, you wrongly wrote an MRI of the right knee, and the MRI was incorrectly performed for the patient.
7. How would you respond to the situation? ……………………………………………..
8. What is the of error? Major/ Minor
9. Would you report the error? Yes/ No
10. Who would you report the error to? Patients/ Residents/ Attendings/ Others
